# Supplementary material for: Cyclam derivatives containing three acetate pendant arms: synthesis, acid–base, metal complexation and structural studies
Source: Royal Society of Chemistry journal article supplement (doi:10.1039/b809100e), 2008-01-01
Supplement: b809100e.pdf [file b809100e.pdf]

## Electronic Supplementary Information

### Cyclam derivatives containing three acetate pendant arms: synthesis, acid-base, metal complexation and structural studies

Luís M. P. Lima,<sup>a</sup> Rita Delgado,<sup>a,b\*</sup> Michael G. B. Drew<sup>c</sup>, Paula Brandão<sup>d</sup> and Vítor Félix<sup>d</sup>

<sup>a</sup> Instituto de Tecnologia Química e Biológica, Universidade Nova de Lisboa, Av. da República - EAN, 2780-157 Oeiras, Portugal. Fax: +351-214 411 277; Tel: +351-214 46 9 737/8; e-mail: [delgado@itqb.unl.pt](mailto:delgado@itqb.unl.pt). <sup>b</sup> Instituto Superior Técnico, Universidade Técnica de Lisboa, Av. Rovisco Pais, 1049-001 Lisboa, Portugal. <sup>c</sup> School of Chemistry, University of Reading, Whiteknights, Reading, UK RG6 6AD, United Kingdom. <sup>d</sup> Departamento de Química, CICECO, Universidade de Aveiro, 3810-193 Aveiro, Portugal

| Content                                                                                                                                                                                                                                                                                                                                                                          | page |
|----------------------------------------------------------------------------------------------------------------------------------------------------------------------------------------------------------------------------------------------------------------------------------------------------------------------------------------------------------------------------------|------|
| <b>Table S1</b> Hydrogen bond dimensions found in solid state for compounds <b>1-5</b>                                                                                                                                                                                                                                                                                           | 2    |
| <b>Table S2</b> Protonation constants ( $\log \beta_{HL}$ ) <sup>a</sup> of the studied ligands determined by potentiometry; $T = 298.2$ K; $I = 0.10$ mol dm <sup>-3</sup> in NMe <sub>4</sub> NO <sub>3</sub>                                                                                                                                                                  | 3    |
| <b>Table S3</b> Stability constants ( $\log \beta_{MHL}$ ) <sup>a</sup> of complexes of the studied ligands with some divalent metal ions determined by potentiometry; $T = 298.2$ K; $I = 0.10$ mol dm <sup>-3</sup> in NMe <sub>4</sub> NO <sub>3</sub>                                                                                                                        | 4    |
| <b>Table S4</b> Peak assignment of the <sup>31</sup> P NMR spectra of zinc(II) and cadmium(II) complexes of H <sub>5</sub> te3a1p at different pH values in water solution                                                                                                                                                                                                       | 5    |
| <b>Fig. S1</b> Species distribution diagram for H <sub>5</sub> te3a1p at $1 \times 10^{-3}$ mol dm <sup>-3</sup>                                                                                                                                                                                                                                                                 | 6    |
| <b>Fig. S2</b> Species distribution diagram for H <sub>3</sub> te3a at $1 \times 10^{-3}$ mol dm <sup>-3</sup>                                                                                                                                                                                                                                                                   | 6    |
| <b>Fig. S3</b> Species distribution diagram for Cu <sup>2+</sup> -H <sub>5</sub> te3a1p at $C_M = C_L = 1 \times 10^{-3}$ mol dm <sup>-3</sup>                                                                                                                                                                                                                                   | 7    |
| <b>Fig. S4</b> Species distribution diagram for Cu <sup>2+</sup> -H <sub>3</sub> te3a at $C_M = C_L = 1 \times 10^{-3}$ mol dm <sup>-3</sup>                                                                                                                                                                                                                                     | 7    |
| <b>Fig. S5</b> Species distribution diagram for an equimolar mixture of Mn <sup>2+</sup> , Zn <sup>2+</sup> , Pb <sup>2+</sup> and H <sub>3</sub> te3a at $1 \times 10^{-1}$ mol dm <sup>-3</sup> . The amount of free ligand and metal complexes is expressed as the sum of all of their protonated species in percentage relative to the initial amount of H <sub>3</sub> te3a | 8    |
| <b>References</b>                                                                                                                                                                                                                                                                                                                                                                | 8    |

**Table S1** Hydrogen bond dimensions found in solid state for the compounds **1–5**

|                                                                                                                                           | H...A / Å <sup>a</sup> | D...A / Å <sup>a</sup> | D–H...A / ° |
|-------------------------------------------------------------------------------------------------------------------------------------------|------------------------|------------------------|-------------|
| <b>(Hte3am)I.MeOH 1</b>                                                                                                                   |                        |                        |             |
| N(11)–H(11A)···N(1)                                                                                                                       | 2.25(2)                | 2.890(2)               | 133(2)      |
| N(11)–H(11B)···N(4)                                                                                                                       | 2.55(2)                | 3.222(2)               | 133(2)      |
| N(23)–H(23A)···N(8)                                                                                                                       | 2.49(2)                | 2.829(2)               | 103(2)      |
| N(17)H(17A)···O(101) [ $x-1/2, -y+5/2, z-1/2$ ]                                                                                           | 2.03(2)                | 2.883(2)               | 167(2)      |
| N(11)–H(11A)···O(161)                                                                                                                     | 2.26(2)                | 2.962(2)               | 141(2)      |
| N(17)–H(17B)···O(161) [ $-x, -y+3, -z$ ]                                                                                                  | 2.08(2)                | 2.951(2)               | 177(2)      |
| N(11)–H(11B)···O(191)                                                                                                                     | 2.08(2)                | 2.874(2)               | 148(2)      |
| N(23)–H(23A)···O(191)                                                                                                                     | 2.11(2)                | 2.931(2)               | 152(2)      |
| N(20)–H(20B)···I [ $-x+1, -y+1, -z$ ]                                                                                                     | 2.84(2)                | 3.696(2)               | 169(2)      |
| N(23)–H(23B)···I                                                                                                                          | 2.97(2)                | 3.792(1)               | 160(2)      |
| O(101)–H(10F)···I                                                                                                                         | 2.71(3)                | 3.537(1)               | 173(2)      |
| <b>(H<sub>2</sub>te2lac)ClI·0.25H<sub>2</sub>O 2</b>                                                                                      |                        |                        |             |
| N(14)–H(14)···Cl [ $x-1/2, -y+1/2, z$ ]                                                                                                   | 2.13                   | 3.035(7)               | 170         |
| N(24)–H(24)···O(100) [ $-x-1/2, y-1/2, -z$ ]                                                                                              | 2.15                   | 2.815(9)               | 129         |
| N(24)–H(24)···Cl [ $x-1/2, -y+1/2, z$ ]                                                                                                   | 2.58                   | 3.292(7)               | 136         |
| <b>(H<sub>4</sub>te2a2p<sup>OEt2</sup>)(I<sub>3</sub>)<sub>2</sub>·0.5I<sub>2</sub> 3</b>                                                 |                        |                        |             |
| N(4)–H(4)···O(161) [ $-x+2, -y+2, -z+1$ ] <sup>b</sup>                                                                                    | 1.88                   | 2.77(1)                | 169         |
| N(24)–H(24)···O(361) [ $-x+1, -y+1, -z+2$ ] <sup>c</sup>                                                                                  | 1.92                   | 2.81(1)                | 165         |
| <b>(H<sub>7</sub>te3a1p)(ClO<sub>4</sub>)<sub>2</sub>·4.25H<sub>2</sub>O 4<sup>d</sup></b>                                                |                        |                        |             |
| N(4)–H(4)···O(182)                                                                                                                        | 2.19                   | 2.720(4)               | 115         |
| N(8)–H(8)···O(202)                                                                                                                        | 2.39                   | 2.718(5)               | 101         |
| N(11)–H(11)···O(222)                                                                                                                      | 2.32                   | 2.720(5)               | 106         |
| N(4)–H(4)···O(163) [ $x-1/2, -y+1, z$ ]                                                                                                   | 1.87                   | 2.703(4)               | 148         |
| N(11)–H(11)···O(201) [ $x+1/2, -y, z$ ]                                                                                                   | 2.27                   | 3.080(5)               | 145         |
| N(11)–H(11)···O(182) [ $-x-1/2, y, z-1/2$ ]                                                                                               | 2.45                   | 3.039(4)               | 121         |
| N(8)–H(8)···O(700) [ $-x+1/2, y, z-1/2$ ]                                                                                                 | 1.93                   | 2.820(5)               | 159         |
| <b>[Cu<sub>2</sub>(Hte3a)(H<sub>2</sub>O)<sub>3</sub>Cl]Cl<sub>0.5</sub>(ClO<sub>4</sub>)<sub>0.5</sub>·2H<sub>2</sub>O 5<sup>d</sup></b> |                        |                        |             |
| O(1)–H(B)···O(181) [ $x+1/2, -y+1/2, z+1/2$ ]                                                                                             | 1.86(5)                | 2.677(7)               | 170(6)      |
| O(2)–H(C)···O(182) [ $x+1/2, -y+1/2, z+1/2$ ]                                                                                             | 1.90(4)                | 2.726(8)               | 178(7)      |
| O(2)–H(D)···Cl(1) [ $-x+1, -y, -z+2$ ]                                                                                                    | 2.46(6)                | 3.246(4)               | 159(6)      |
| O(2)–H(F)···O(202) [ $-x+1/2, y-1/2, -z+3/2$ ]                                                                                            | 1.93(6)                | 2.720(8)               | 159(6)      |

<sup>a</sup> A, D denote the proton acceptor and donor, respectively; <sup>b</sup> and <sup>c</sup> correspond to the hydrogen dimensions found for the first and second molecule of **2**, respectively; <sup>d</sup> the hydrogen bonds involving disordered water molecules are not quoted.

**Table S2** Protonation constants ( $\log \beta_{HL}$ )<sup>a</sup> of the studied ligands determined by potentiometry;  $T = 298.2$  K;  $I = 0.10$  mol dm<sup>-3</sup> in NMe<sub>4</sub>NO<sub>3</sub>

| Species HL | H <sub>3</sub> te3a1p | H <sub>3</sub> te3a | H <sub>4</sub> teta <sup>b</sup> | H <sub>8</sub> tetp <sup>b</sup> |
|------------|-----------------------|---------------------|----------------------------------|----------------------------------|
| 11         | 11.78(1) <sup>c</sup> | 11.91(2)            | 10.59                            | -                                |
| 12         | 21.66(1)              | 21.14(2)            | 20.68                            | 25.28                            |
| 13         | 28.00(1)              | 24.87(3)            | 24.80                            | 34.13                            |
| 14         | 31.85(1)              | 27.81(3)            | 28.09                            | 41.81                            |
| 15         | 34.48(2)              | 29.80(7)            | 29.9                             | 48.04                            |
| 16         | 36.62(2)              | -                   | -                                | 53.37                            |
| 17         | -                     | -                   | -                                | 55.65                            |

<sup>a</sup> Values in brackets are standard deviations in the last significant figure.

<sup>b</sup> From refs. 1 and 2. <sup>c</sup> Determined by <sup>31</sup>P NMR spectroscopy.

**Table S2** Stability constants ( $\log \beta_{\text{MHL}}$ )<sup>a</sup> of complexes of the studied ligands with some divalent metal ions determined by potentiometry.  $T = 298.2 \text{ K}$ ;  $I = 0.10 \text{ mol dm}^{-3}$  in  $\text{NMe}_4\text{NO}_3$

| Ion              | Species MHL | H <sub>5</sub> te3a1p | H <sub>3</sub> te3a | H <sub>4</sub> teta   | H <sub>8</sub> tetp   |
|------------------|-------------|-----------------------|---------------------|-----------------------|-----------------------|
| Ca <sup>2+</sup> | 101         | 6.69(1)               | 5.08(2)             | 8.4 <sup>b</sup>      | -                     |
|                  | 111         | 15.42(2)              | -                   | 15.6 <sup>b</sup>     | 19.33                 |
|                  | 1-11        | -3.55(1)              | -6.59(2)            | -                     | -                     |
|                  | 1-21        | -15.29(2)             | -                   | -                     | -                     |
| Mn <sup>2+</sup> | 101         | 11.64(2)              | 12.56(2)            | 11.3 <sup>b</sup>     | 10.8 <sup>d</sup>     |
|                  | 111         | 19.26(2)              | 18.59(4)            | -                     | -                     |
|                  | 121         | 25.67(3)              | 24.40(4)            | -                     | -                     |
|                  | 131         | 31.12(3)              | 27.83(7)            | -                     | -                     |
|                  | 1-11        | 2.40(3)               | 2.37(2)             | -                     | -                     |
|                  | 1-21        | -8.44(5)              | -                   | -                     | -                     |
| Co <sup>2+</sup> | 101         | 16.42(2)              | 19.53(2)            | 16.6 <sup>b</sup>     | 15.3 <sup>d</sup>     |
|                  | 111         | 23.74(1)              | 23.14(2)            | 20.8 <sup>b</sup>     | -                     |
|                  | 121         | 27.53(1)              | -                   | 23.64 <sup>b</sup>    | -                     |
|                  | 1-11        | 5.34(2)               | 7.48(4)             | -                     | -                     |
| Ni <sup>2+</sup> | 101         | 20.04(3)              | 20.19(2)            | 19.91 <sup>b</sup>    | 15.6 <sup>d</sup>     |
|                  | 111         | 27.26(2)              | 23.81(2)            | 24.11 <sup>b</sup>    | -                     |
|                  | 121         | 31.08(2)              | -                   | 27.31 <sup>b</sup>    | -                     |
|                  | 1-11        | 10.52(3)              | 9.34(3)             | -                     | -                     |
| Cu <sup>2+</sup> | 101         | 21.58(3)              | 21.84(3)            | 21.07(2) <sup>e</sup> | 25.99(8) <sup>e</sup> |
|                  | 111         | 28.43(1)              | 25.08(3)            | 24.51(2) <sup>e</sup> | 34.08(7) <sup>e</sup> |
|                  | 121         | 31.79(1)              | -                   | 26.98(3) <sup>e</sup> | 41.01(7) <sup>e</sup> |
|                  | 131         | -                     | -                   | -                     | 46.90(7) <sup>e</sup> |
|                  | 141         | -                     | -                   | -                     | 51.93(4) <sup>e</sup> |
|                  | 1-11        | 10.30(3)              | 9.93(4)             | -                     | -                     |
| Zn <sup>2+</sup> | 101         | 18.16(3)              | 19.63(1)            | 17.48(4) <sup>f</sup> | 18.31(4) <sup>f</sup> |
|                  | 111         | 25.31(1)              | 23.09(1)            | 21.64(4)              | 27.44(4)              |
|                  | 121         | 28.84(2)              | -                   | 25.01(4)              | 34.63(4)              |
|                  | 131         | -                     | -                   | -                     | 41.29(3)              |
|                  | 141         | -                     | -                   | -                     | 46.79(3)              |
|                  | 1-11        | 6.95(4)               | 7.56(3)             | 6.68(6)               | 7.22(5)               |
| Cd <sup>2+</sup> | 101         | 17.90(2)              | 18.14(1)            | 18.0 <sup>b</sup>     | 16.7 <sup>d</sup>     |
|                  | 111         | 25.22(1)              | 21.71(1)            | 22.04 <sup>b</sup>    | -                     |
|                  | 121         | 28.81(1)              | 24.28(7)            | 24.44 <sup>c</sup>    | -                     |
|                  | 1-11        | 8.34(3)               | 7.37(2)             | -                     | -                     |
|                  | 1-21        | -2.82(3)              | -                   | -                     | -                     |
| Pb <sup>2+</sup> | 101         | 13.58(4)              | 13.53(1)            | 14.3 <sup>b</sup>     | 15.5 <sup>d</sup>     |
|                  | 111         | 21.66(3)              | 19.25(2)            | 19.05 <sup>b</sup>    | -                     |
|                  | 121         | 26.93(2)              | 24.42(1)            | 23.3 <sup>b</sup>     | -                     |
|                  | 131         | 30.81(7)              | 27.81(3)            | -                     | -                     |
|                  | 1-11        | 3.72(4)               | 2.83(1)             | -                     | -                     |
|                  | 1-21        | -8.43(9)              | -                   | -                     | -                     |

<sup>a</sup> Values in brackets are standard deviations in the last significant figure. <sup>b</sup> From ref. 3. <sup>c</sup> From ref. 4; the value in ref. 3 is incorrect. <sup>d</sup> From ref. 5. <sup>e</sup> Previously cited in ref. 1. <sup>f</sup> Previously cited in ref. 6.

**Table S3** Peak assignment of the  $^{31}\text{P}$  NMR spectra of zinc(II) and cadmium(II) complexes of  $\text{H}_5\text{te3a1p}$  at different pH values in water solution

| Metal            | pH    | Ligand resonance (ppm) | Complex resonance(s) (ppm) |
|------------------|-------|------------------------|----------------------------|
| $\text{Zn}^{2+}$ | 2.94  | 13.06                  | -                          |
|                  | 6.47  | 13.85                  | 14.20, 15.08               |
|                  | 7.97  | 6.90                   | 12.63, 13.43               |
|                  | 8.78  | 6.58                   | 12.36, 13.15               |
|                  | 10.50 | 7.08                   | 12.33, 13.11               |
| $\text{Cd}^{2+}$ | 2.50  | 11.92                  | 16.75                      |
|                  | 5.73  | 14.17                  | 16.48                      |
|                  | 8.60  | 6.64                   | 14.39                      |

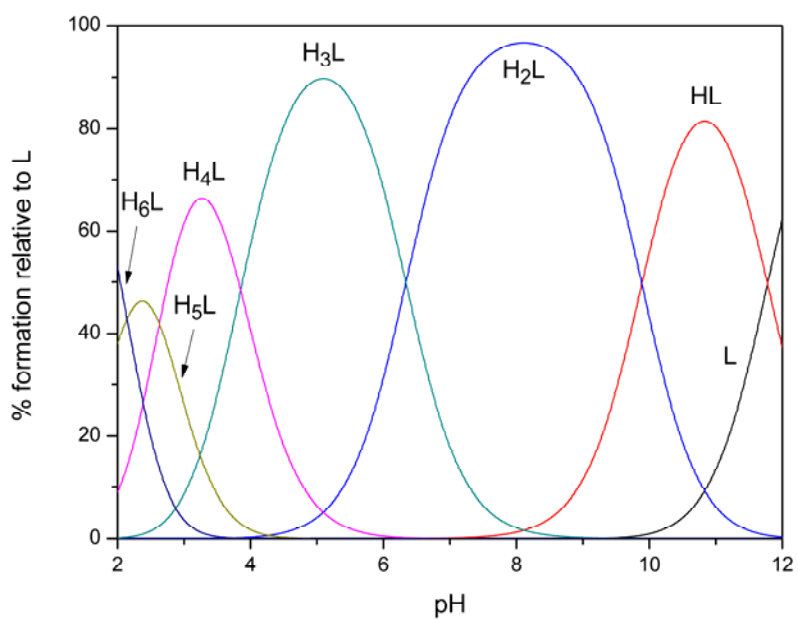

**Fig. S1** Species distribution diagram for H<sub>5</sub>te3a1p at 1 × 10<sup>-3</sup> mol dm<sup>-3</sup>.

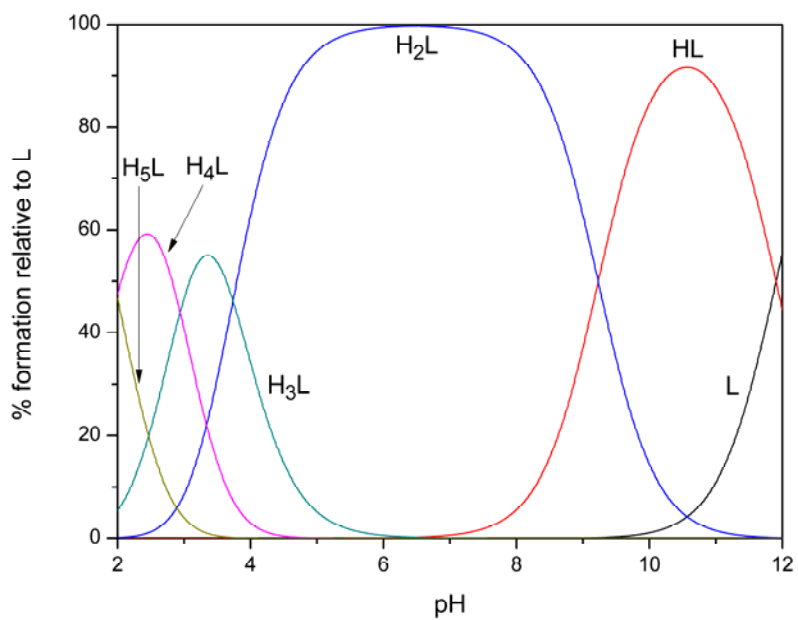

**Fig. S2** Species distribution diagram for H<sub>3</sub>te3a at 1 × 10<sup>-3</sup> mol dm<sup>-3</sup>.

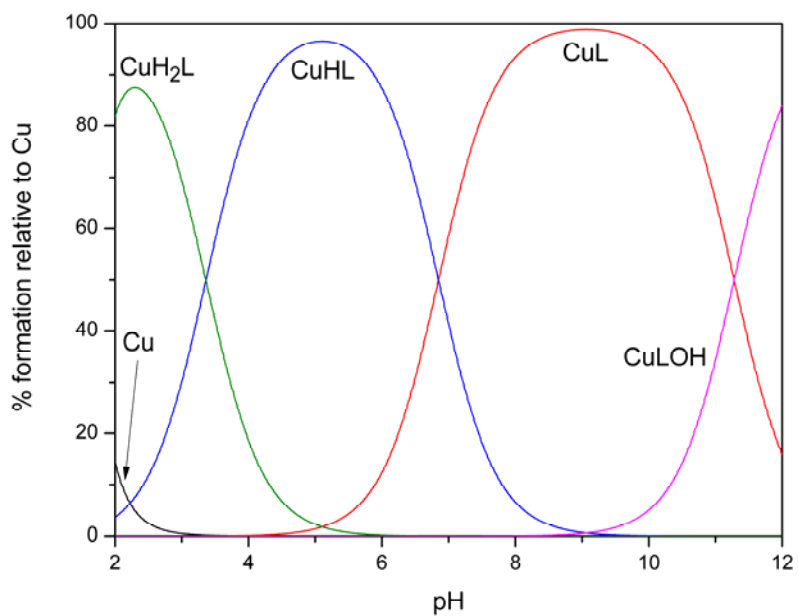

**Fig. S3** Species distribution diagram for Cu<sup>2+</sup>-H<sub>5</sub>te3a1p at  $C_M = C_L = 1 \times 10^{-3} \text{ mol dm}^{-3}$ .

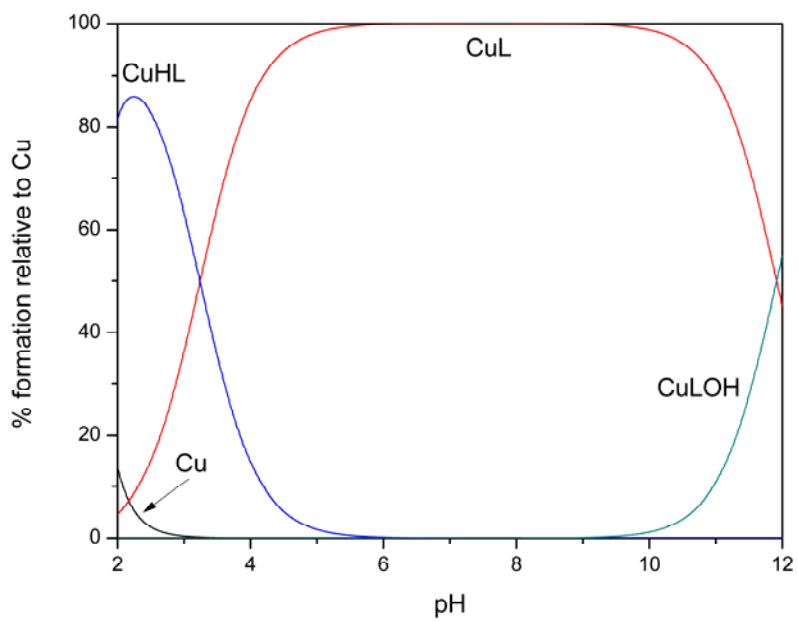

**Fig. S4** Species distribution diagram for Cu<sup>2+</sup>-H<sub>3</sub>te3a at  $C_M = C_L = 1 \times 10^{-3} \text{ mol dm}^{-3}$ .

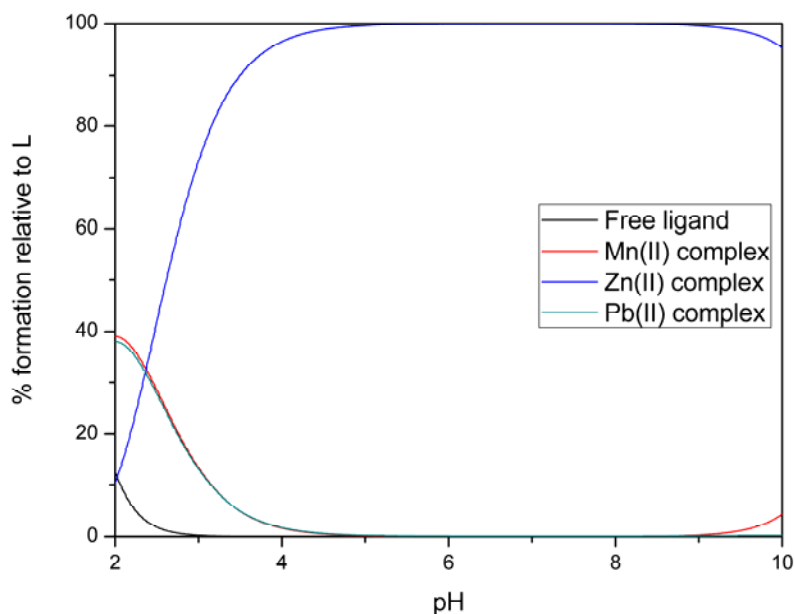

**Fig. S5** Species distribution diagram for an equimolar mixture of Mn<sup>2+</sup>, Zn<sup>2+</sup>, Pb<sup>2+</sup> and H<sub>3</sub>te3a at 1×10<sup>-1</sup> mol dm<sup>-3</sup>. The amount of free ligand and metal complexes is expressed as the sum of all of their protonated species in percentage relative to the initial amount of H<sub>3</sub>te3a.

## References

1. R. Delgado, J. Costa, K. P. Guerra and L. M. P. Lima, *Pure Appl. Chem.*, 2005, **3**, 569-579.
2. F. Marques, L. Gano, M. P. Campello, S. Lacerda, I. Santos, L. M. P. Lima, J. Costa, P. Antunes and R. Delgado, *J. Inorg. Biochem.*, 2006, **100**, 270-280.
3. G. Anderegg, F. Arnaud-Neu, R. Delgado, J. Felcman and K. Popov, *Pure Appl. Chem.*, 2005, **77**, 1445-1495.
4. S. Chaves, R. Delgado and J. J. R. Fraústo da Silva, *Talanta*, 1992, **39**, 249-254.
5. M.I. Kabachnik and Y. M. Polikarpov, *Zh. Obsch. Khim (USSR)*, 1988, **58**, 1937-1962.
6. R. Delgado, V. Félix, L. M. P. Lima and D. W. Price, *Dalton Trans.*, 2007, 2734-2745.
